# Supplementary material
Source: Springer Nature journal article supplement (https://www.springermedizin.de/resource/supplementary/12993_2011_366_MOESM1_ESM.pdf/9617630)
Supplement: MOESM1 [file 9617630]

**A)**

Time spent in open sections ZM

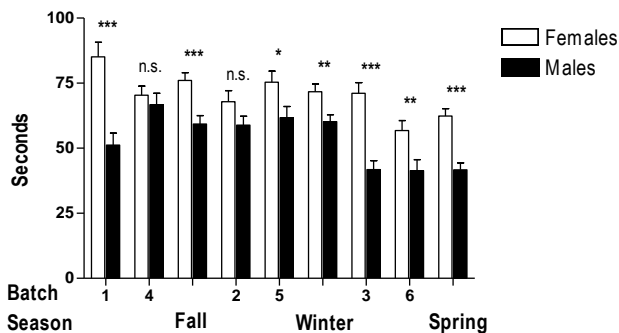

Post hoc Duncan's test ( $p < 0.05$ ):

**BATCH:** 3 and 6 are different from 1, 4, 2 and 5

**SEASON:** Spring is different from Fall and Winter

**B)**

Entries into open sections ZM

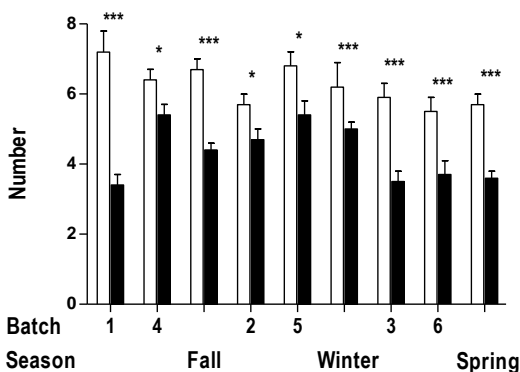

Post hoc Duncan's test ( $p < 0.05$ ):

**BATCH:** 4 and 5 are different from 1, 2, 3 and 6

**SEASON:** Spring is different from Fall and Winter

**C)**

Stretched attend postures in the ZM

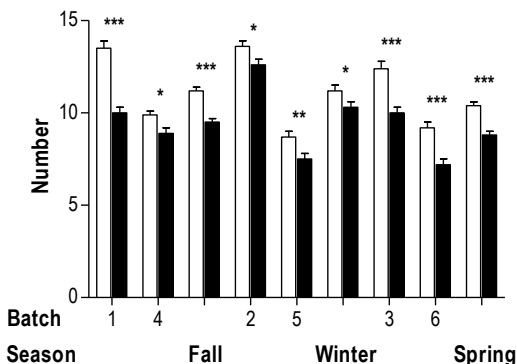

Post hoc Duncan's test ( $p < 0.05$ ):

**BATCH:** 5 and 6 are different from 1, 2, 3 and 4

4 is different from 1, 2 and 3

2 is different from 1 and 3

**SEASON:** Spring is different from Fall and Winter
